# Supplementary material for: A Novel Patient-specific Protein Expression-based Algorithmic Model for Immune Checkpoint Inhibition Therapy Response Prediction in a Pan-cancer Cohort
Source: Preprints.org preprint supplement (doi:10.20944/preprints201908.0131.v1), 2019-08-11
Supplement: Supplementary file 1 [file supplementary]

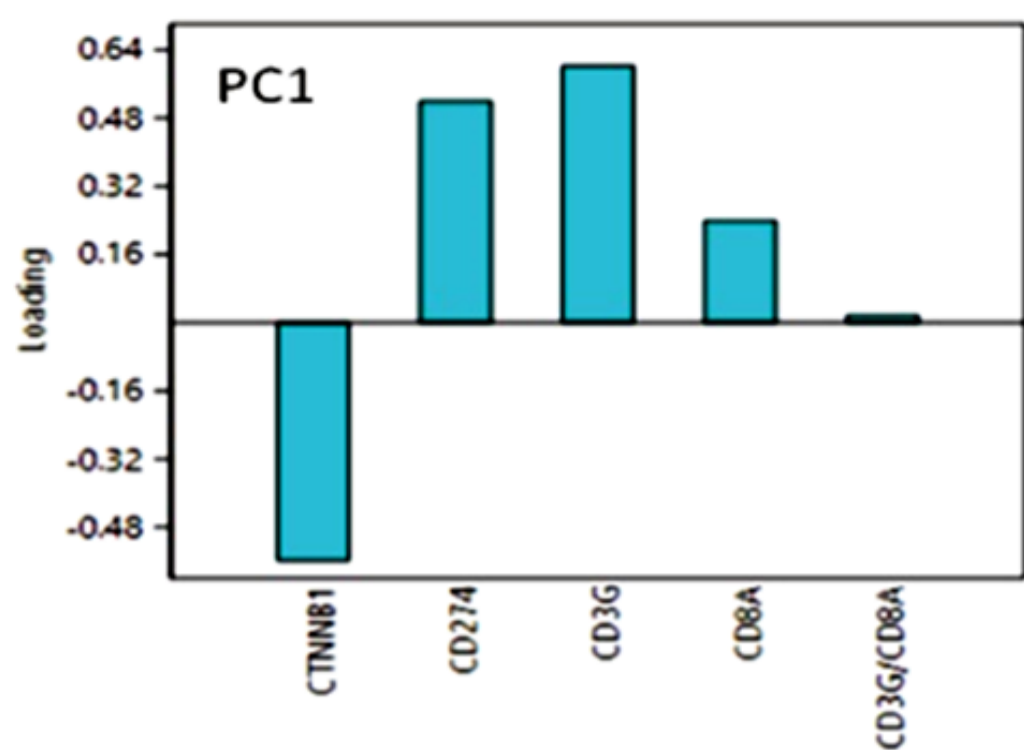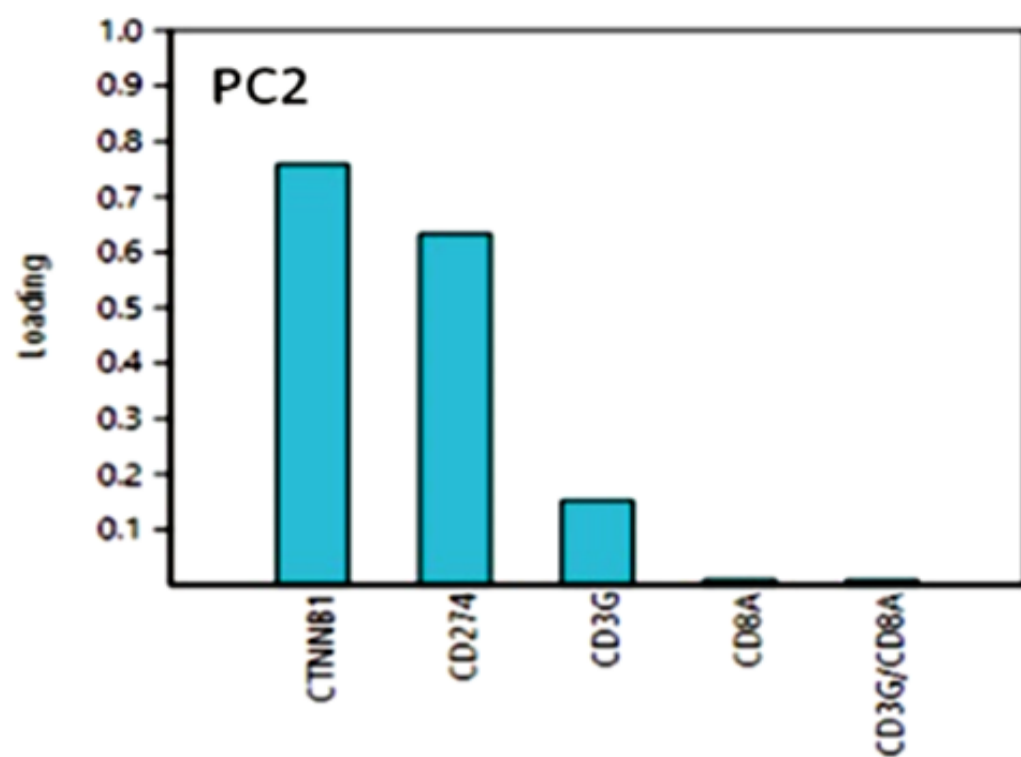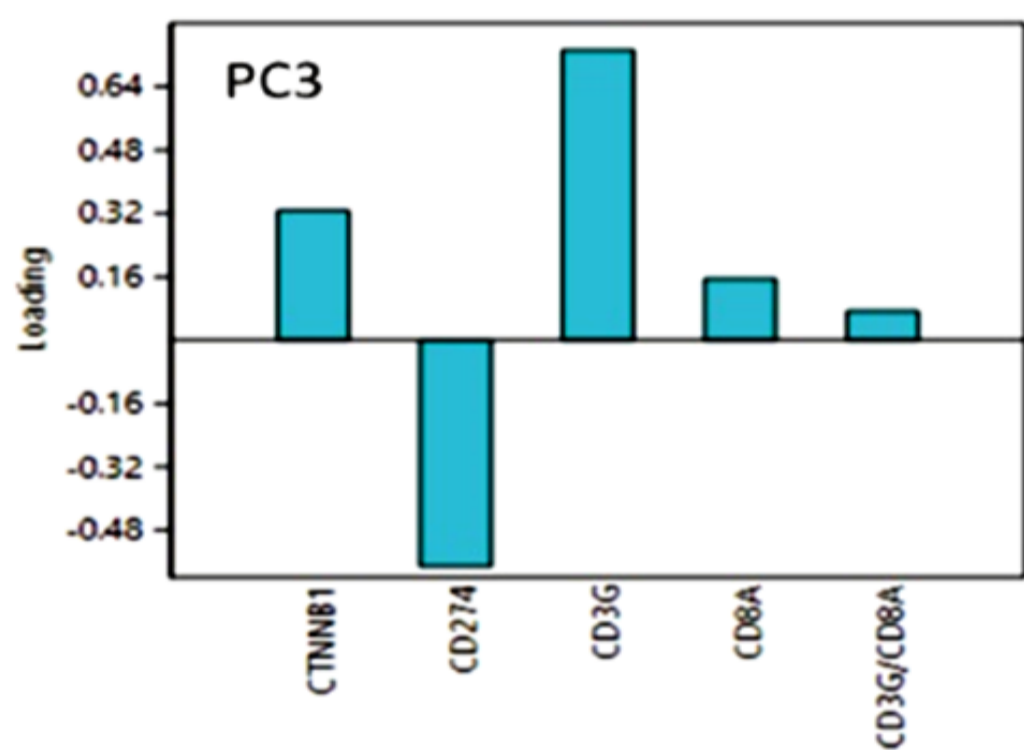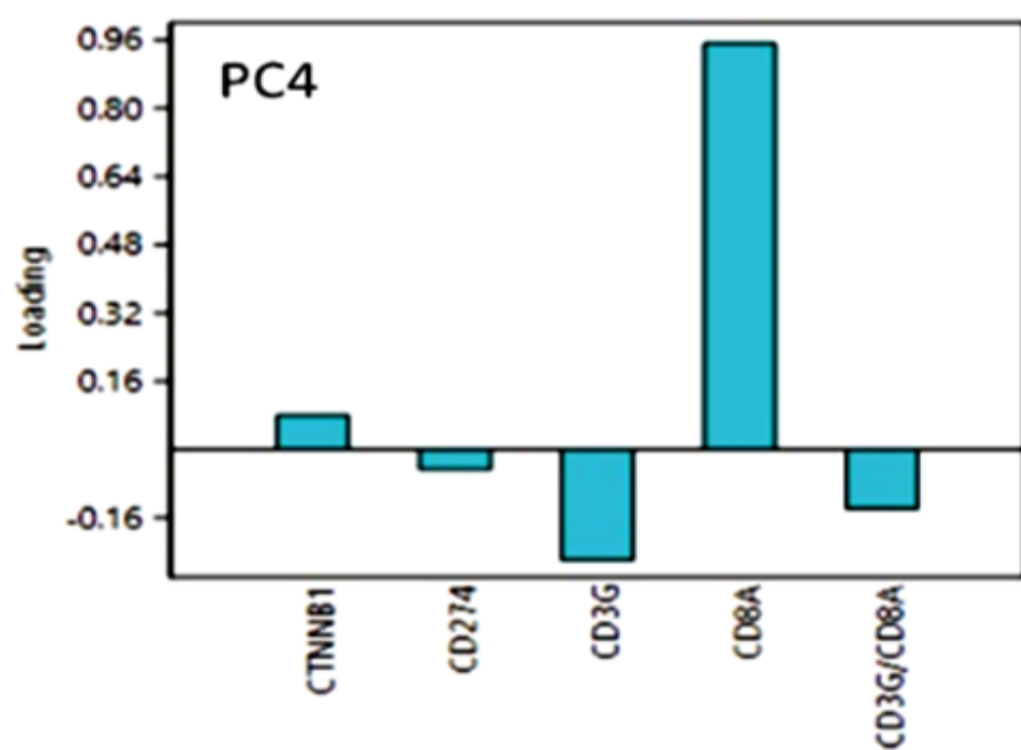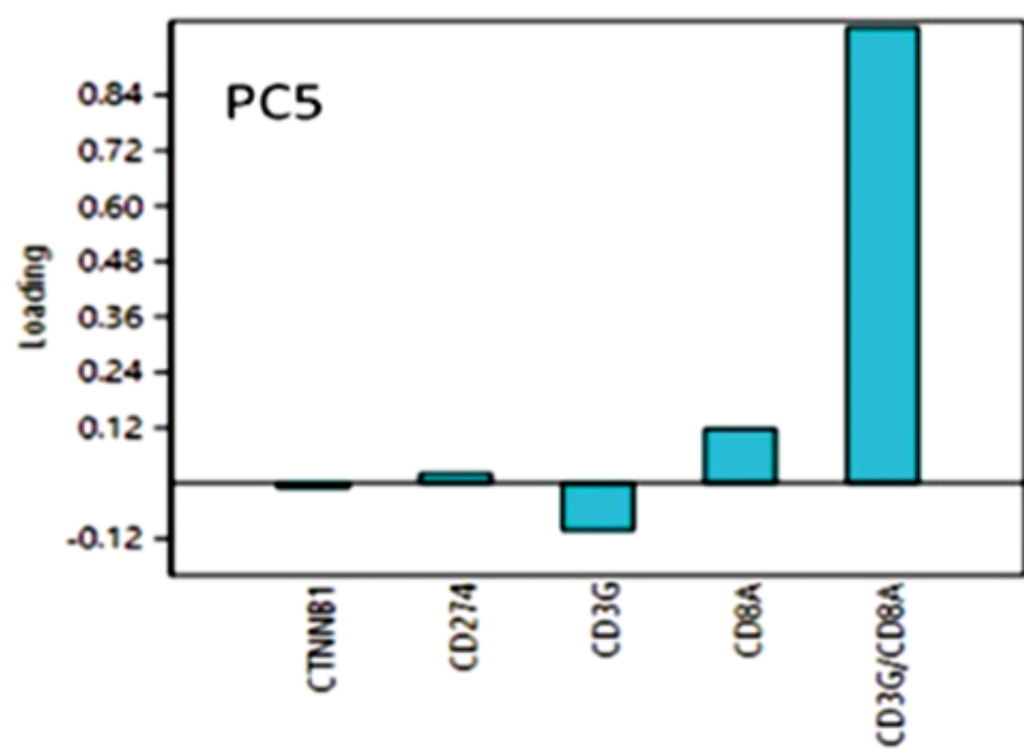

Supplementary Figure S1

**A**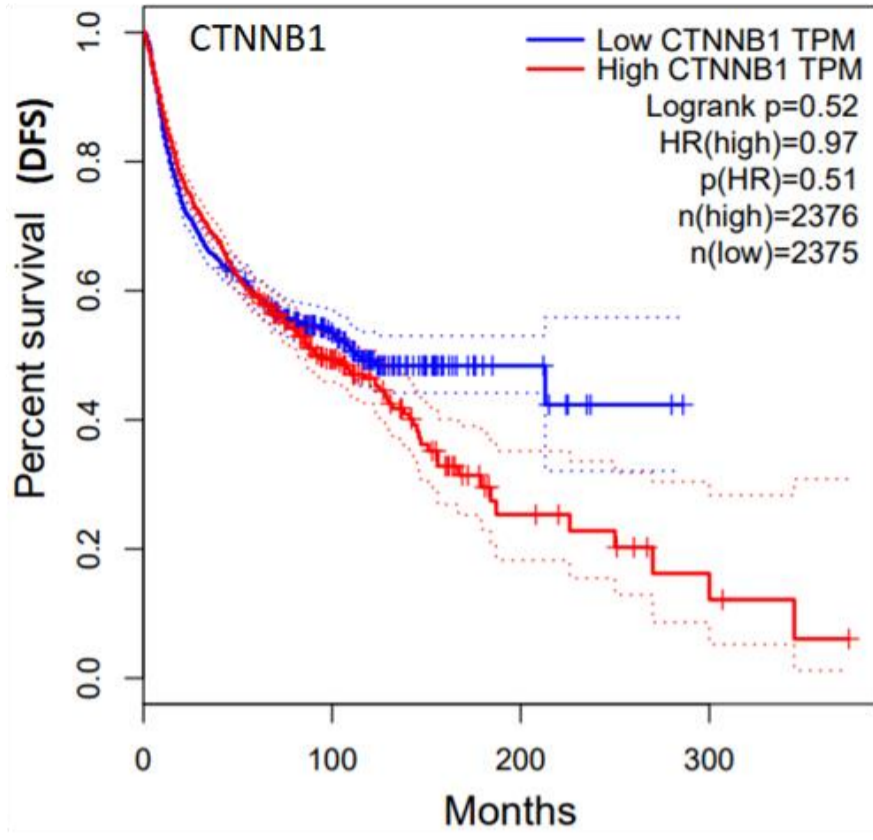**B**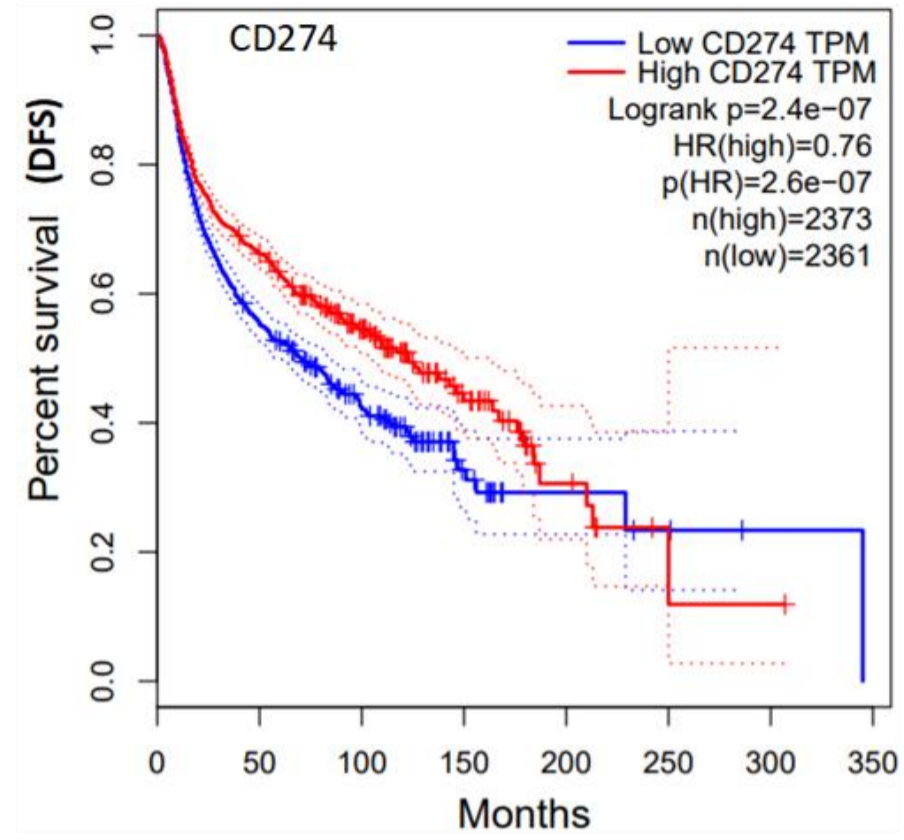**C**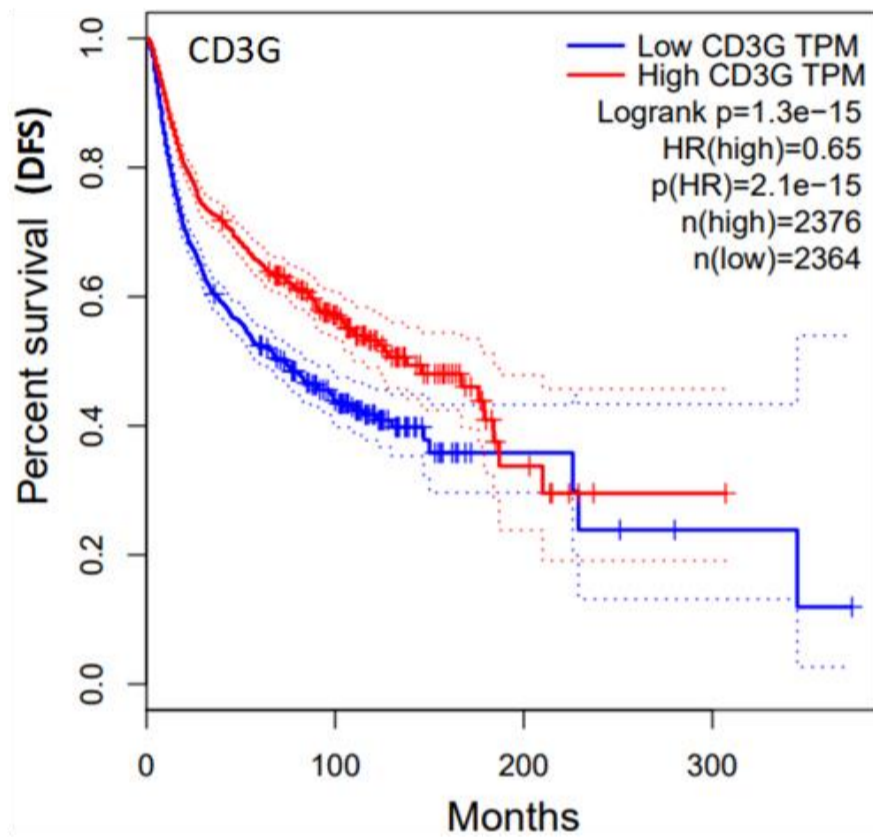**D**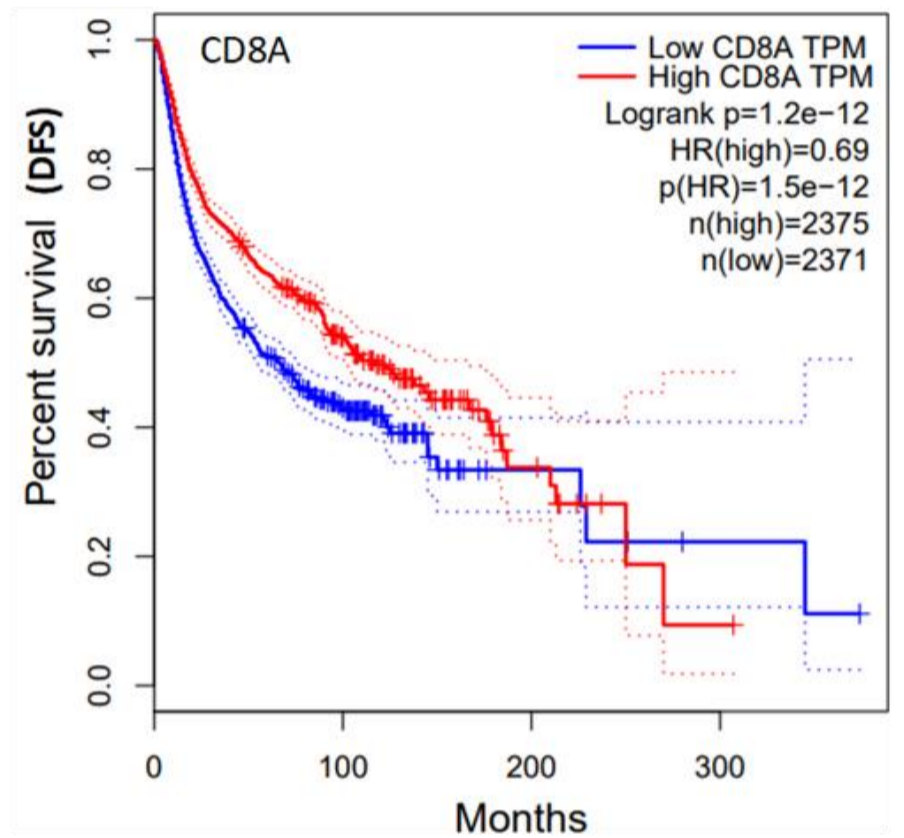

Supplementary Figure S2

**Supplementary Table S1.** Multiple regression analysis of cohort proteome profile show protein factors relevant for the prediction model and their statistical significance

| Dependent Y                                 |             | CTNNB1         |             |       |
|---------------------------------------------|-------------|----------------|-------------|-------|
| Method                                      |             | Forward        |             |       |
| Enter variable if P <                       |             | 0.05           |             |       |
| Remove variable if P >                      |             | 0.1            |             |       |
| Sample size                                 |             | 23             |             |       |
| Coefficient of determination R <sup>2</sup> |             | 0.415          |             |       |
| R <sup>2</sup> -adjusted                    |             | 0.356          |             |       |
| Multiple correlation coefficient            |             | 0.644          |             |       |
| Residual standard deviation                 |             | 10.538         |             |       |
| <b>Regression Equation</b>                  |             |                |             |       |
| Independent variables                       | Coefficient | Std. Error     | t           | P     |
| (Constant)                                  | 38.886      |                |             |       |
| CD274                                       | 0.527       | 0.232          | 2.267       | 0.035 |
| CD8A                                        | -2.301      | 0.612          | -3.760      | 0.001 |
| <b>Variables not included in the model</b>  |             |                |             |       |
| CD3G                                        |             |                |             |       |
| CD3G/CD8A                                   |             |                |             |       |
| <b>Analysis of Variance</b>                 |             |                |             |       |
| Source                                      | DF          | Sum of Squares | Mean Square |       |
| Regression                                  | 2           | 1572.938       | 786.469     |       |
| Residual                                    | 20          | 2221.094       | 111.055     |       |
| F-ratio                                     |             | 7.0818         |             |       |
| Significance level                          |             | P = 0.005      |             |       |
| <b>Zero order correlation coefficients</b>  |             |                |             |       |
| Variable                                    | r           |                |             |       |
| CD274                                       | 0.028       |                |             |       |
| CD3G                                        | -0.446      |                |             |       |
| CD8A                                        | -0.514      |                |             |       |
| CD3G/CD8A                                   | -0.096      |                |             |       |

**Supplementary Table S2.** Analyses of the quality of our novel patient specific mathematical ICBT response prediction algorithm

|                                           |                                                                                                                                                       |
|-------------------------------------------|-------------------------------------------------------------------------------------------------------------------------------------------------------|
| <b>Model :</b>                            | <b>Predict Response = 0.111 + 0.438*CD8A + -5.7284/CTNNB1 + 0.005*CD274^2 + -0.757/CD274^2 - 0.017*CD274*CD8A - 6.003e-5*CD8A^4 - 0.0006*CTNNB1^2</b> |
| <b>'Fit' Analysis</b>                     |                                                                                                                                                       |
| <b>R<sup>2</sup> Goodness of Fit</b>      | 0.99998393                                                                                                                                            |
| <b>Correlation Coefficient</b>            | 0.99999219                                                                                                                                            |
| <b>Maximum Error (ME)</b>                 | 0.011190485                                                                                                                                           |
| <b>Mean Squared Error (MSE)</b>           | 1.3388473e-5                                                                                                                                          |
| <b>Mean Absolute Error (MAE)</b>          | 0.001940829                                                                                                                                           |
| <b>Coefficients</b>                       | 8                                                                                                                                                     |
| <b>Complexity</b>                         | 45                                                                                                                                                    |
| <b>Primary Objective</b>                  | 0.001940829                                                                                                                                           |
| <b>Fit (Normalized Primary Objective)</b> | 0.0023406983                                                                                                                                          |
